# Supplementary material
Source: PubMed Central journal article supplement (PMC2660776)
Supplement: 0810276106_Appendix_PDF.pdf [file 0810276106_Appendix_PDF.pdf]

## SI Appendix

### Basic Approach:

We compare epigenetic pairwise distances between cells isolated from different parts of the same tumor. Experimentally, cells are sampled from individual cancer glands, and therefore the simulations follow the ancestries of both cells and their glands. Whereas adjacent cells within a gland may or may not be closely related, cells on opposite sides of a tumor (separated by several centimeters) cannot be closely related and likely last shared a common ancestor around the time of transformation. Therefore, average pairwise tag distances between opposite cancer sides are used to estimate cancer mitotic age (total numbers of divisions since transformation). Tag pairwise distances within glands are also used to estimate relative numbers of long-lived or cancer stem cell (CSC) lineages per gland. Cancer glands likely contain many CSCs if average pairwise tag distances within a gland are similar to the distances between tags from opposite cancer sides:

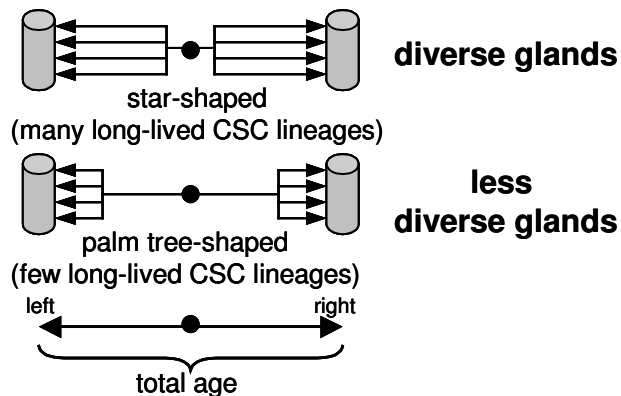

### Simulating Tumor Growth:

Rapid initial exponential growth was simulated with BGN and LOC tags (available at <http://www-hsc.usc.edu/~kims/SupplementaryInfo.html>). Starting from a first transformed cell and single tag, 32 exponential doubling divisions were simulated to produce about four billion cells. Cells were grouped within glands, with gland fission or replication occurring whenever gland size exceeded a threshold:

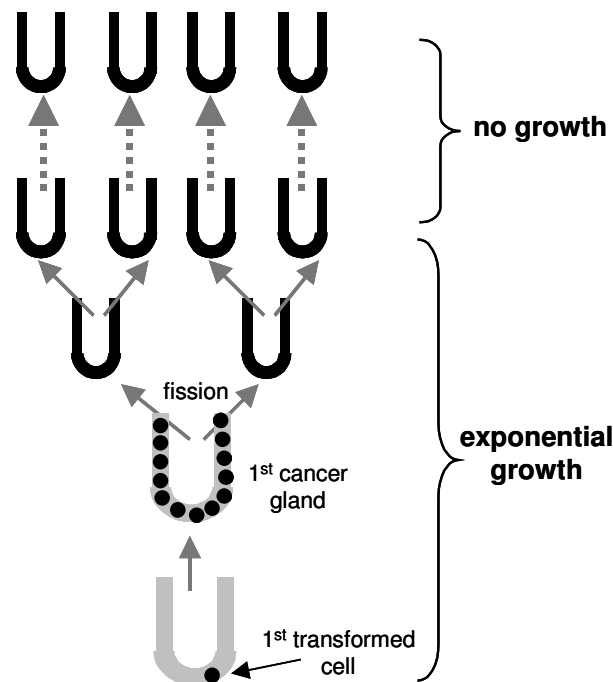

After exponential growth and the end of gland fission or duplication, cell division is balanced by cell death (i.e. cell numbers are constant). Whereas all cancer cells are “stem” cells during exponential growth (because no cells die), the onset of cancer cell death after exponential growth allows for a stem cell hierarchy---non-CSCs die whereas CSC lineages persist. This no-growth phase is essentially the same as simulating normal colon crypts (1), with cancer glands consisting of long-lived CSC lineages and shorter-lived non-CSCs. There are two different types of potential CSCs---deterministic stem cells (100% asymmetric divisions) and stochastic stem cells (50% asymmetric and 50% symmetric divisions, balanced such that CSC numbers per gland remain constant):

**Simulated CSC Scenarios For Cancer Glands With 8,192 Total Cells**

| Scenario                    | CSCs per gland | Division                        | non-CSCs per gland | numbers of non-CSC divisions |
|-----------------------------|----------------|---------------------------------|--------------------|------------------------------|
| rare CSCs                   | 1              | 100% asymmetric                 | 8191               | 12                           |
| all CSCs                    | 4096           | 50% asymmetric<br>50% symmetric | 4096               | 0                            |
| multiple deterministic CSCs | 2-2048*        | 100% asymmetric                 | 6144-8190          | 11-1                         |
| multiple stochastic CSCs    | 2-2048*        | 50% asymmetric<br>50% symmetric | 6144-8190          | 11-1                         |

\*either 2, 4, 8,.....,2048 CSCs per gland

**Estimating Cancer Mitotic Ages With LOC and BGN Tag Data:**

To improve cancer mitotic age estimates, BGN and LOC tag data are combined. Average pairwise distances between BGN and LOC tags from opposite cancer sides should correlate:

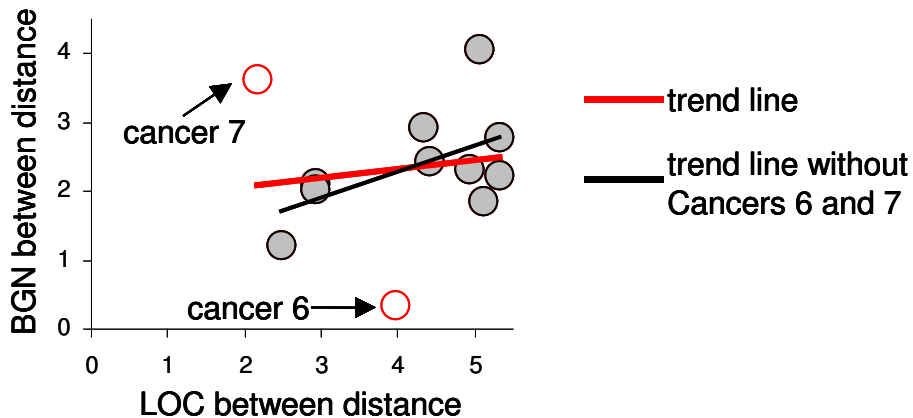

The correlation of LOC and BGN pairwise distances between opposite sides is poor, and Cancer 6 and Cancer 7 appear to be outliers. One reason for a lack of correlation may be cancer specific differences in error rates. It has been previously noted that error rates for the BGN tag are smaller when the tag is unmethylated (2), indicating that methylation error rates are not constant but may vary as a function of tag methylation. Plotted are the ratios of average LOC to BGN tag methylation for each cancer:

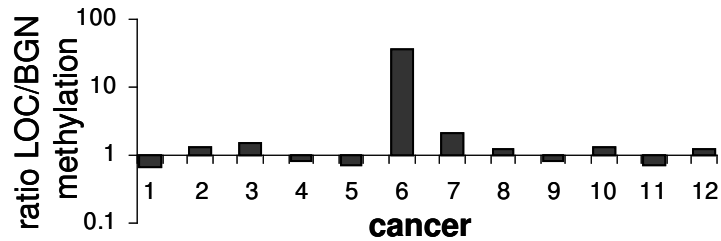

This plot reveals that Cancers 6 and 7 have the greatest discordances between LOC and BGN percent methylation. Cancer 6 has extremely low average BGN tag methylation (2%) compared to its LOC methylation (76%). Cancer 7 has relatively high average LOC tag methylation (90%) compared to its BGN methylation (43%). Overall for the 12 cancers, average LOC methylation is 70% and average BGN methylation is 59%. These data indicate that some of the discordances between LOC and BGN tag distances may be due to variations in error rates when tag methylation is either very low or very high. This observation is used to justify the cancer specific changes in methylation error rates noted below.

### Estimating Cancer Mitotic Ages:

Estimating the mitotic age of an individual cancer is problematic. However, it is easier to estimate the average mitotic age of a group of cancers because most cancers are unlikely to arise suddenly within a few months or remain asymptomatic or undetected for many years. As a first approximation, we assume that most cancers are removed within two years after transformation, which yields estimated error rates per CpG site per division of 0.0003 for the BGN tag and 0.0005 for the LOC tag (both methylation and demethylation changes are possible). These error rates give similar estimated LOC and BGN mitotic ages for each tumor (see below). For the 12 cancers in this study, estimated mitotic ages were 250 to 1,130 divisions (average of 642 divisions), which translates to about 8 to 37 months (average of 21 months) assuming one division per day.

Tag pairwise distances between cancer sides were simulated for the different CSC scenarios. Similar average curves were generated regardless of the number of CSCs per gland, consistent with the idea that pairwise distances between opposite sides measure the overall mitotic age of the cancer. Mitotic ages were estimated by curve fitting, with the overall estimated cancer mitotic age based on both tag estimates:

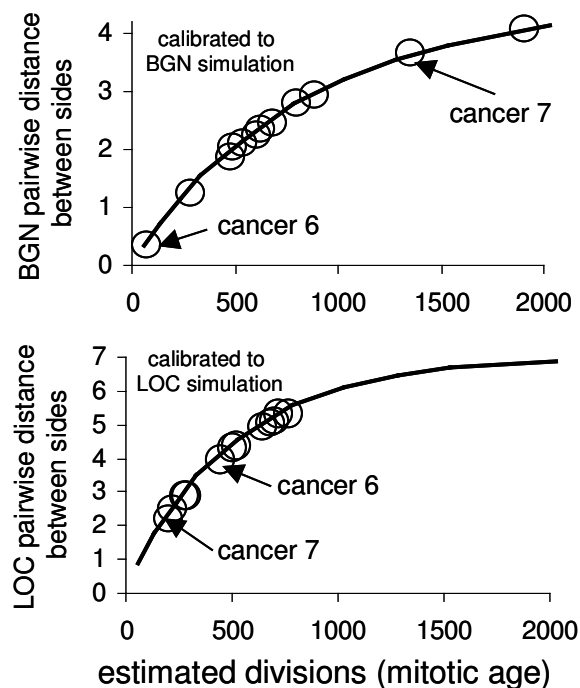

BGN and LOC cancer mitotic age estimates were fairly close for 10 cancers, with greater discordances with Cancers 6 and 7. For Cancer 6, most BGN tags were unmethylated (average 2%) and a prior analysis (2) indicated that BGN error rates are lower until some CpG sites become methylated. The error rate for BGN was therefore changed to from 0.0003 to 0.00005 to better match the mitotic age estimated from the LOC data. For Cancer 7, average LOC tag methylation was relatively high (90%) and the demethylation error rate was changed to 0.0001 per division per CpG site. These changes in error rates also allowed simulations to better fit other experimental data for these cancers (unique tags per gland, intragland tag distances). Mitotic age estimates were also adjusted for Cancers 4, 8, and 9, by simulations that modeled the 8 instead of 9 CpG sites in their BGN tags. Adjusted cancer mitotic age estimates are provided below:

**Table of Mitotic Age Estimates**

| Cancer | BGN distance between sides | BGN estimated divisions | LOC distance between sides | LOC estimated divisions | overall estimated mitotic age |
|--------|----------------------------|-------------------------|----------------------------|-------------------------|-------------------------------|
| 1      | 1.9                        | 480                     | 5.1                        | 700                     | 590                           |
| 2      | 1.2                        | 280                     | 2.5                        | 220                     | 250                           |
| 3      | 2.4                        | 680                     | 4.4                        | 520                     | 600                           |
| 4      | 2.3*                       | 720                     | 4.9                        | 640                     | 660                           |
| 5      | 2.9                        | 880                     | 4.3                        | 500                     | 690                           |
| 6      | 0.4                        | 400 <sup>†</sup>        | 4.0                        | 440                     | 420                           |
| 7      | 3.6                        | 1350                    | 2.2                        | 910 <sup>‡</sup>        | 500                           |
| 8      | 2.1*                       | 620                     | 2.9                        | 280                     | 400                           |
| 9      | 2.2*                       | 680                     | 5.3                        | 720                     | 700                           |
| 10     | 2.0                        | 490                     | 2.9                        | 270                     | 380                           |
| 11     | 2.8                        | 800                     | 5.3                        | 760                     | 780                           |
| 12     | 4.1                        | 1900                    | 5.1                        | 680                     | 1100                          |

\* BGN tag had 8 CpG sites in these patients whereas 9 CpG sites were present in the other 9 patients

<sup>†</sup> The error rate for BGN was changed to from 0.0003 to 0.00005 because most BGN tag were unmethylated and a prior analysis (2) indicated that BGN error rates are lower until some CpG sites become methylated.

<sup>‡</sup> The demethylation error rate for LOC was changed to 0.0001 from 0.0005 because average tag methylation was relatively high in this cancer.

The correlation between LOC and BGN estimated cancer mitotic ages was improved after these adjustments:

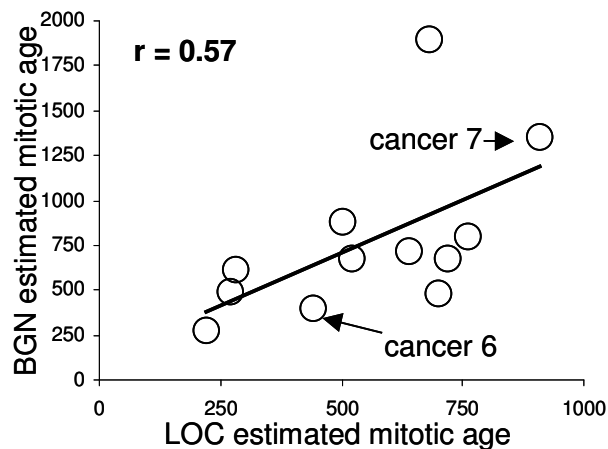

## Estimating CSCs Per Cancer Gland:

It is possible to infer numbers of long-lived lineages or CSCs per cancer gland by comparing tag diversity between cancer sides with tag diversity within cancer glands. Simulations with rapid initial exponential growth can be performed with different numbers of CSCs per gland. Two simple extreme scenarios are a single CSC per gland, or that all cells within a gland effectively function as CSCs (stochastic survival with a 0.5 probability of offspring survival). Neither scenario appeared to fit the experimental BGN tag data for unique tags per gland or intragland tag distances, which fell between these two extreme scenarios:

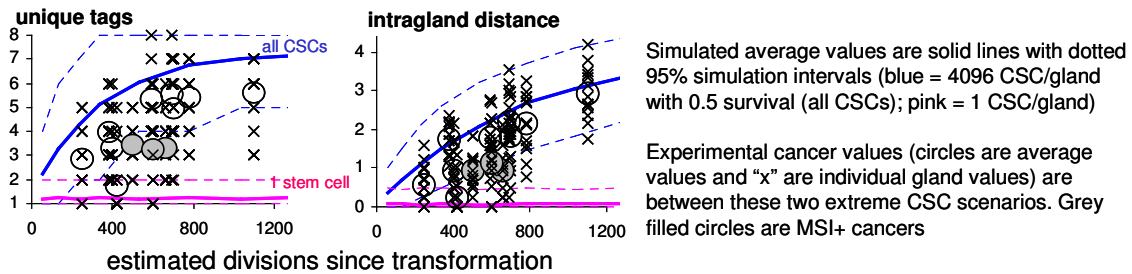

Scenarios with intermediate numbers of CSCs per gland better fit the experimental data:

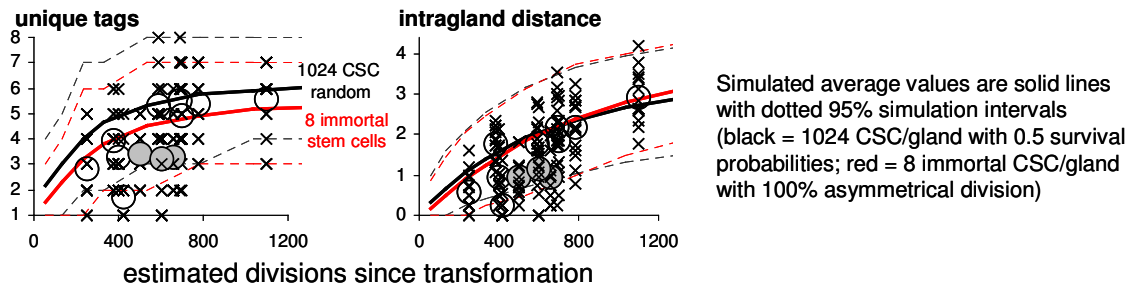

One can better match the experimental data by either increasing numbers of immortal or deterministic CSCs per gland, or decreasing numbers of stochastic CSCs per gland. A single scenario does not appear to fit all the cancers, so cancer specific simulations were performed to infer likely numbers of CSCs per gland with respect to the experimental data from each cancer (see below).

Of note, simulations indicated that average tag distances between opposite cancer sides did not change with different numbers of CSCs per gland, which indicates that cancer mitotic age estimates do not depend on CSC number estimates:

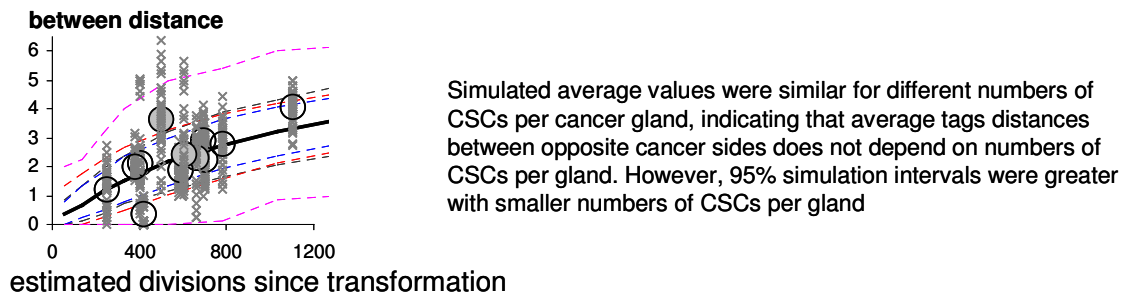

Similar results are seen with LOC tags, with the experimental data intermediate between the extreme simulated scenarios of one CSC per gland or with all cells effectively CSCs:

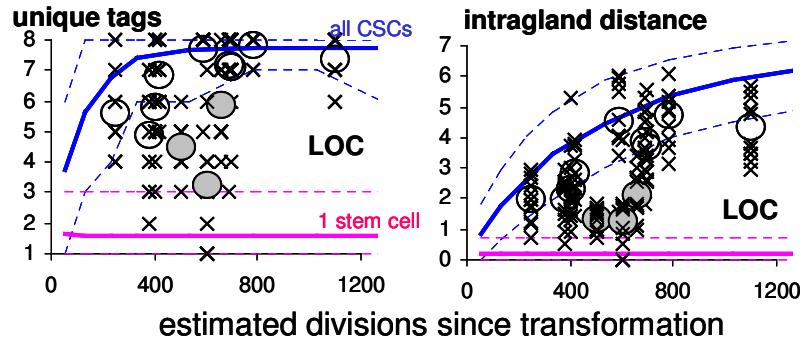

Simulations with intermediate numbers of either deterministic or stochastic CSCs per gland better fit the experimental LOC tag data:

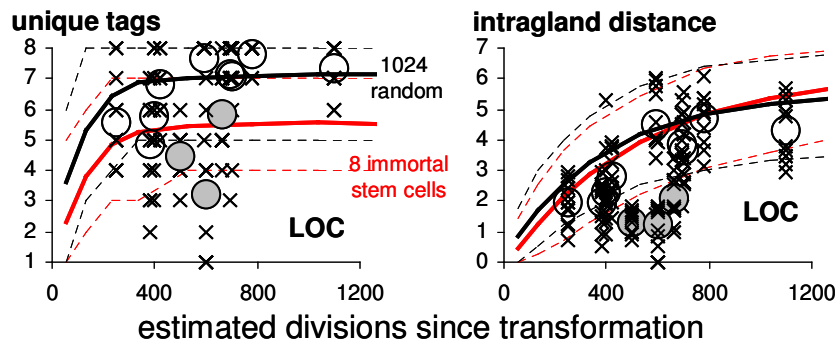

As before, simulations with different numbers of CSCs per gland did not substantially change average LOC tag distances between opposite cancer sides, although 95% simulation intervals were greater with smaller numbers of CSCs per gland:

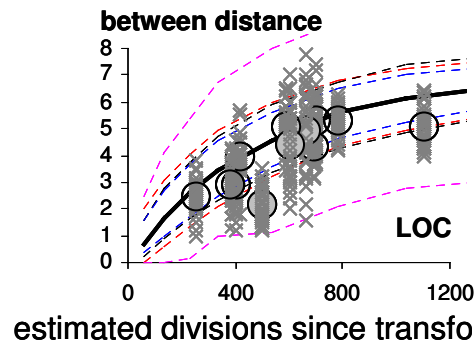

Experimental cancer tag values were intermediate between simulations with 1 CSC per gland or 4,096 CSCs per 8,196 cell gland (i.e. all CSCs). A single CSC scenario does not appear to fit the experimental data from all of the cancers. Therefore, cancer specific simulations were performed to ascertain which CSC scenarios best fit both their LOC and BGN experimental data, using stem cell multiples of two (ie 2, 4, ..., 2048 CSCs per gland) with either 100% asymmetric (deterministic) or 50% asymmetric (stochastic) division. The following Tables indicates the number of individual experimental values (unique tags per gland and intragland pairwise distances) that fell within 95% simulation intervals:

| BGN Data                |          |           |                                | Unique Tags/Gland |                    | Intragland Pairwise Distance         |                                    | Summary                                              |                   |                                 | comments              |
|-------------------------|----------|-----------|--------------------------------|-------------------|--------------------|--------------------------------------|------------------------------------|------------------------------------------------------|-------------------|---------------------------------|-----------------------|
|                         | specimen | divisions | simulated stem cells per gland | survival          | total sampled tags | tags within 95% simulation intervals | total sampled intragland distances | intragland distances within 95% simulation intervals | total comparisons | within 95% simulation intervals |                       |
| cancer 1                | 590      | 1024      | 0.5                            | 13                | 13                 | 13                                   | 12                                 | 26                                                   | 25                | 0.962                           |                       |
|                         |          | 1         | 1                              | 13                | 0                  | 13                                   | 0                                  | 26                                                   | 0                 | 0                               |                       |
|                         |          | 4096      | 0.5                            | 13                | 13                 | 13                                   | 12                                 | 26                                                   | 25                | 0.962                           |                       |
|                         |          | 16        | 1                              | 13                | 13                 | 13                                   | 12                                 | 26                                                   | 25                | 0.962                           |                       |
| cancer 2                | 250      | 1024      | 0.5                            | 14                | 14                 | 14                                   | 14                                 | 28                                                   | 28                | 1                               |                       |
|                         |          | 1         | 1                              | 14                | 10                 | 14                                   | 8                                  | 28                                                   | 18                | 0.643                           |                       |
|                         |          | 4096      | 0.5                            | 14                | 12                 | 14                                   | 12                                 | 28                                                   | 24                | 0.857                           |                       |
|                         |          | 8         | 1                              | 14                | 14                 | 14                                   | 14                                 | 28                                                   | 28                | 1                               |                       |
| cancer 3                | 600      | 64        | 0.5                            | 14                | 12                 | 14                                   | 12                                 | 28                                                   | 24                | 0.857                           |                       |
|                         |          | 1         | 1                              | 14                | 5                  | 14                                   | 3                                  | 28                                                   | 8                 | 0.286                           |                       |
|                         |          | 4096      | 0.5                            | 14                | 6                  | 14                                   | 7                                  | 28                                                   | 13                | 0.464                           |                       |
|                         |          | 4         | 1                              | 14                | 10                 | 14                                   | 11                                 | 28                                                   | 21                | 0.75                            |                       |
| cancer 4<br>8 CpG sites | 660      | 128       | 0.5                            | 14                | 13                 | 14                                   | 14                                 | 28                                                   | 27                | 0.964                           |                       |
|                         |          | 1         | 1                              | 14                | 6                  | 14                                   | 5                                  | 28                                                   | 11                | 0.393                           |                       |
|                         |          | 4096      | 0.5                            | 14                | 6                  | 14                                   | 7                                  | 28                                                   | 13                | 0.464                           |                       |
|                         |          | 4         | 1                              | 14                | 13                 | 14                                   | 10                                 | 28                                                   | 23                | 0.821                           |                       |
| cancer 5                | 690      | 1024      | 0.5                            | 14                | 13                 | 14                                   | 13                                 | 28                                                   | 26                | 0.929                           |                       |
|                         |          | 1         | 1                              | 14                | 1                  | 14                                   | 1                                  | 28                                                   | 2                 | 0.071                           |                       |
|                         |          | 4096      | 0.5                            | 14                | 13                 | 14                                   | 13                                 | 28                                                   | 26                | 0.929                           |                       |
|                         |          | 8         | 1                              | 14                | 12                 | 14                                   | 12                                 | 28                                                   | 24                | 0.857                           |                       |
| cancer 6                | 420      | 512       | 0.5                            | 14                | 13                 | 14                                   | 13                                 | 28                                                   | 26                | 0.929                           | 0.00005<br>error rate |
|                         |          | 1         | 1                              | 14                | 12                 | 14                                   | 11                                 | 28                                                   | 23                | 0.821                           |                       |
|                         |          | 4096      | 0.5                            | 14                | 13                 | 14                                   | 13                                 | 28                                                   | 26                | 0.929                           |                       |
|                         |          | 8         | 1                              | 14                | 12                 | 14                                   | 13                                 | 28                                                   | 25                | 0.893                           |                       |
| cancer 7                | 1130     | 256       | 0.5                            | 14                | 14                 | 14                                   | 14                                 | 28                                                   | 28                | 1                               |                       |
|                         |          | 1         | 1                              | 14                | 3                  | 14                                   | 3                                  | 28                                                   | 6                 | 0.214                           |                       |
|                         |          | 4096      | 0.5                            | 14                | 3                  | 14                                   | 0                                  | 28                                                   | 3                 | 0.107                           |                       |
|                         |          | 4         | 1                              | 14                | 14                 | 14                                   | 14                                 | 28                                                   | 28                | 1                               |                       |
| cancer 8<br>8 CpG sites | 400      | 256       | 0.5                            | 14                | 14                 | 14                                   | 14                                 | 28                                                   | 28                | 1                               |                       |
|                         |          | 1         | 1                              | 14                | 4                  | 14                                   | 2                                  | 28                                                   | 6                 | 0.214                           |                       |
|                         |          | 4096      | 0.5                            | 14                | 10                 | 14                                   | 12                                 | 28                                                   | 22                | 0.786                           |                       |
|                         |          | 4         | 1                              | 14                | 13                 | 14                                   | 14                                 | 28                                                   | 27                | 0.964                           |                       |
| cancer 9<br>8 CpG sites | 700      | 1024      | 0.5                            | 14                | 13                 | 14                                   | 13                                 | 28                                                   | 26                | 0.929                           |                       |
|                         |          | 1         | 1                              | 14                | 1                  | 14                                   | 1                                  | 28                                                   | 2                 | 0.071                           |                       |
|                         |          | 4096      | 0.5                            | 14                | 12                 | 14                                   | 12                                 | 28                                                   | 24                | 0.857                           |                       |
|                         |          | 16        | 1                              | 14                | 13                 | 14                                   | 12                                 | 28                                                   | 25                | 0.893                           |                       |
| cancer 10               | 380      | 128       | 0.5                            | 14                | 14                 | 14                                   | 14                                 | 28                                                   | 28                | 1                               |                       |
|                         |          | 1         | 1                              | 14                | 2                  | 14                                   | 0                                  | 28                                                   | 2                 | 0.071                           |                       |
|                         |          | 4096      | 0.5                            | 14                | 14                 | 14                                   | 12                                 | 28                                                   | 26                | 0.929                           |                       |
|                         |          | 8         | 1                              | 14                | 14                 | 14                                   | 14                                 | 28                                                   | 28                | 1                               |                       |
| cancer 11               | 780      | 1024      | 0.5                            | 14                | 12                 | 14                                   | 13                                 | 28                                                   | 25                | 0.893                           |                       |
|                         |          | 1         | 1                              | 14                | 0                  | 14                                   | 0                                  | 28                                                   | 0                 | 0                               |                       |
|                         |          | 4096      | 0.5                            | 14                | 10                 | 14                                   | 11                                 | 28                                                   | 21                | 0.75                            |                       |
|                         |          | 8         | 1                              | 14                | 14                 | 14                                   | 13                                 | 28                                                   | 27                | 0.964                           |                       |
| cancer 12               | 1100     | 1024      | 0.5                            | 14                | 12                 | 14                                   | 13                                 | 28                                                   | 25                | 0.893                           |                       |
|                         |          | 1         | 1                              | 14                | 0                  | 14                                   | 0                                  | 28                                                   | 0                 | 0                               |                       |
|                         |          | 4096      | 0.5                            | 14                | 11                 | 14                                   | 13                                 | 28                                                   | 24                | 0.857                           |                       |
|                         |          | 8         | 1                              | 14                | 13                 | 14                                   | 13                                 | 28                                                   | 26                | 0.929                           |                       |
|                         |          |           |                                |                   |                    | TOTALS                               |                                    |                                                      |                   |                                 |                       |
|                         |          |           |                                |                   |                    | multiple stochastic                  |                                    | 334                                                  | 316               | 0.946                           |                       |
|                         |          |           |                                |                   |                    | one CSC per gland                    |                                    | 334                                                  | 78                | 0.234                           |                       |
|                         |          |           |                                |                   |                    | all CSCs                             |                                    | 334                                                  | 247               | 0.74                            |                       |
|                         |          |           |                                |                   |                    | multiple deterministic               |                                    | 334                                                  | 307               | 0.919                           |                       |

| LOC data  |          |           |                                | Unique Tags/Gland      |                    | Intragland Pairwise Distance         |                                    | Summary                                              |                   |                                 | comments                        |
|-----------|----------|-----------|--------------------------------|------------------------|--------------------|--------------------------------------|------------------------------------|------------------------------------------------------|-------------------|---------------------------------|---------------------------------|
|           | specimen | divisions | simulated stem cells per gland | survival               | total sampled tags | tags within 95% simulation intervals | total sampled intragland distances | intragland distances within 95% simulation intervals | total comparisons | within 95% simulation intervals |                                 |
| cancer 1  | 590      | 1024      | 0.5                            | 10                     | 10                 | 10                                   | 7                                  | 20                                                   | 17                | 0.85                            |                                 |
|           |          | 1         | 1                              | 10                     | 0                  | 10                                   | 0                                  | 20                                                   | 0                 | 0                               |                                 |
|           |          | 4096      | 0.5                            | 10                     | 9                  | 10                                   | 9                                  | 20                                                   | 18                | 0.9                             |                                 |
|           |          | 16        | 1                              | 10                     | 10                 | 10                                   | 8                                  | 20                                                   | 18                | 0.9                             |                                 |
| cancer 2  | 250      | 1024      | 0.5                            | 12                     | 12                 | 12                                   | 11                                 | 24                                                   | 23                | 0.958                           |                                 |
|           |          | 1         | 1                              | 12                     | 0                  | 12                                   | 1                                  | 24                                                   | 1                 | 0.042                           |                                 |
|           |          | 4096      | 0.5                            | 12                     | 9                  | 12                                   | 9                                  | 24                                                   | 18                | 0.75                            |                                 |
|           |          | 8         | 1                              | 12                     | 10                 | 12                                   | 11                                 | 24                                                   | 21                | 0.875                           |                                 |
| cancer 3  | 600      | 64        | 0.5                            | 12                     | 8                  | 12                                   | 8                                  | 24                                                   | 16                | 0.667                           |                                 |
|           |          | 1         | 1                              | 12                     | 7                  | 12                                   | 4                                  | 24                                                   | 11                | 0.458                           |                                 |
|           |          | 4096      | 0.5                            | 12                     | 2                  | 12                                   | 1                                  | 24                                                   | 3                 | 0.125                           |                                 |
|           |          | 4         | 1                              | 12                     | 7                  | 12                                   | 2                                  | 24                                                   | 9                 | 0.375                           |                                 |
| cancer 4  | 660      | 128       | 0.5                            | 12                     | 11                 | 12                                   | 12                                 | 24                                                   | 23                | 0.958                           |                                 |
|           |          | 1         | 1                              | 12                     | 0                  | 12                                   | 0                                  | 24                                                   | 0                 | 0                               |                                 |
|           |          | 4096      | 0.5                            | 12                     | 6                  | 12                                   | 0                                  | 24                                                   | 6                 | 0.25                            |                                 |
|           |          | 4         | 1                              | 12                     | 8                  | 12                                   | 5                                  | 24                                                   | 13                | 0.542                           |                                 |
| cancer 5  | 690      | 1024      | 0.5                            | 11                     | 10                 | 11                                   | 10                                 | 22                                                   | 20                | 0.909                           |                                 |
|           |          | 1         | 1                              | 11                     | 1                  | 11                                   | 0                                  | 22                                                   | 1                 | 0.045                           |                                 |
|           |          | 4096      | 0.5                            | 11                     | 10                 | 11                                   | 6                                  | 22                                                   | 16                | 0.727                           |                                 |
|           |          | 8         | 1                              | 11                     | 5                  | 11                                   | 10                                 | 22                                                   | 15                | 0.682                           |                                 |
| cancer 6  | 420      | 512       | 0.5                            | 10                     | 10                 | 10                                   | 9                                  | 20                                                   | 19                | 0.95                            |                                 |
|           |          | 1         | 1                              | 10                     | 0                  | 10                                   | 0                                  | 20                                                   | 0                 | 0                               |                                 |
|           |          | 4096      | 0.5                            | 10                     | 9                  | 10                                   | 6                                  | 20                                                   | 15                | 0.75                            |                                 |
|           |          | 8         | 1                              | 10                     | 7                  | 10                                   | 9                                  | 20                                                   | 16                | 0.8                             |                                 |
| cancer 7  | 1130     | 256       | 0.5                            | 12                     | 12                 | 12                                   | 12                                 | 24                                                   | 24                | 1                               | 0.0005 demethylation error rate |
|           |          | 1         | 1                              | 12                     | 0                  | 12                                   | 0                                  | 24                                                   | 0                 | 0                               |                                 |
|           |          | 4096      | 0.5                            | 12                     | 12                 | 12                                   | 8                                  | 24                                                   | 20                | 0.833                           |                                 |
|           |          | 4         | 1                              | 12                     | 12                 | 12                                   | 12                                 | 24                                                   | 24                | 1                               |                                 |
| cancer 8  | 400      | 256       | 0.5                            | 12                     | 12                 | 12                                   | 10                                 | 24                                                   | 22                | 0.917                           |                                 |
|           |          | 1         | 1                              | 12                     | 1                  | 12                                   | 0                                  | 24                                                   | 1                 | 0.042                           |                                 |
|           |          | 4096      | 0.5                            | 12                     | 5                  | 12                                   | 2                                  | 24                                                   | 7                 | 0.292                           |                                 |
|           |          | 4         | 1                              | 12                     | 8                  | 12                                   | 10                                 | 24                                                   | 18                | 0.75                            |                                 |
| cancer 9  | 700      | 1024      | 0.5                            | 12                     | 11                 | 12                                   | 8                                  | 24                                                   | 19                | 0.792                           |                                 |
|           |          | 1         | 1                              | 12                     | 0                  | 12                                   | 0                                  | 24                                                   | 0                 | 0                               |                                 |
|           |          | 4096      | 0.5                            | 12                     | 11                 | 12                                   | 5                                  | 24                                                   | 16                | 0.667                           |                                 |
|           |          | 16        | 1                              | 12                     | 11                 | 12                                   | 8                                  | 24                                                   | 19                | 0.792                           |                                 |
| cancer 10 | 380      | 128       | 0.5                            | 12                     | 12                 | 12                                   | 12                                 | 24                                                   | 24                | 1                               |                                 |
|           |          | 1         | 1                              | 12                     | 3                  | 12                                   | 1                                  | 24                                                   | 4                 | 0.167                           |                                 |
|           |          | 4096      | 0.5                            | 12                     | 5                  | 12                                   | 7                                  | 24                                                   | 12                | 0.5                             |                                 |
|           |          | 8         | 1                              | 12                     | 11                 | 12                                   | 8                                  | 24                                                   | 19                | 0.792                           |                                 |
| cancer 11 | 780      | 1024      | 0.5                            | 10                     | 10                 | 10                                   | 10                                 | 20                                                   | 20                | 1                               |                                 |
|           |          | 1         | 1                              | 10                     | 0                  | 10                                   | 0                                  | 20                                                   | 0                 | 0                               |                                 |
|           |          | 4096      | 0.5                            | 10                     | 10                 | 10                                   | 8                                  | 20                                                   | 18                | 0.9                             |                                 |
|           |          | 8         | 1                              | 10                     | 2                  | 10                                   | 10                                 | 20                                                   | 12                | 0.6                             |                                 |
| cancer 12 | 1100     | 1024      | 0.5                            | 12                     | 12                 | 12                                   | 12                                 | 24                                                   | 24                | 1                               |                                 |
|           |          | 1         | 1                              | 12                     | 0                  | 12                                   | 0                                  | 24                                                   | 0                 | 0                               |                                 |
|           |          | 4096      | 0.5                            | 12                     | 12                 | 12                                   | 6                                  | 24                                                   | 18                | 0.75                            |                                 |
|           |          | 8         | 1                              | 12                     | 6                  | 12                                   | 12                                 | 24                                                   | 18                | 0.75                            |                                 |
|           |          |           |                                | TOTALS                 |                    |                                      |                                    |                                                      |                   |                                 |                                 |
|           |          |           |                                | multiple stochastic    |                    |                                      |                                    | 274                                                  | 251               | 0.916                           |                                 |
|           |          |           |                                | one CSC per gland      |                    |                                      |                                    | 274                                                  | 18                | 0.066                           |                                 |
|           |          |           |                                | all CSCs               |                    |                                      |                                    | 274                                                  | 167               | 0.609                           |                                 |
|           |          |           |                                | multiple deterministic |                    |                                      |                                    | 274                                                  | 202               | 0.737                           |                                 |



Simulations with either small numbers of deterministic CSCs (4 to 16 per gland) or greater numbers of stochastic CSCs (64 to 1,024 per gland) were more consistent with the experimental data (see Table 3 in the manuscript and the Table below). In addition, it appears that the numbers of CSCs per cancer gland can differ between cancers (see Table 2 the manuscript).

**Robustness of the Simulations:**

To test whether changes in parameter values markedly change our conclusions about numbers of CSCs per cancer gland, simulations were performed with different methylation error rates. The conclusion that cancer glands are maintained by a hierarchy with intermediate numbers of CSCs was unchanged when error rates were increased two-fold higher (with average cancer ages of 10.5 months) or decreased two-fold lower (with average cancer ages of 42 months).

**Portions of intragland experimental values within 95 percent simulation intervals**

| CSC Scenario                | BGN tags<br>low/middle/high<br>error rates* | LOC tags<br>low/middle/high<br>error rates* | Both<br>low/middle/high<br>error rates* |
|-----------------------------|---------------------------------------------|---------------------------------------------|-----------------------------------------|
| one CSC per gland           | 0.19/0.23/0.31                              | 0.05/0.07/0.12                              | 0.13/0.16/0.23                          |
| all CSCs                    | 0.72/0.74/0.68                              | 0.69/0.61/0.56                              | 0.70/0.68/0.63                          |
| multiple deterministic CSCs | 0.89/0.92/0.90                              | 0.71/0.73/0.80                              | 0.81/0.84/0.86                          |
| multiple stochastic CSCs    | 0.87/0.95/0.90                              | 0.92/0.92/0.83                              | 0.89/0.93/0.87                          |
| total comparisons           | 334                                         | 274                                         | 608                                     |

\*BGN low/middle/high error rates are 0.00015, 0.0003, and 0.0006 changes per CpG site per division. LOC low/middle/high error rates are 0.00025, 0.0005, and 0.001 changes per CpG site per division.

The proportions of BGN and LOC experimental data consistent with the simulations are illustrated:

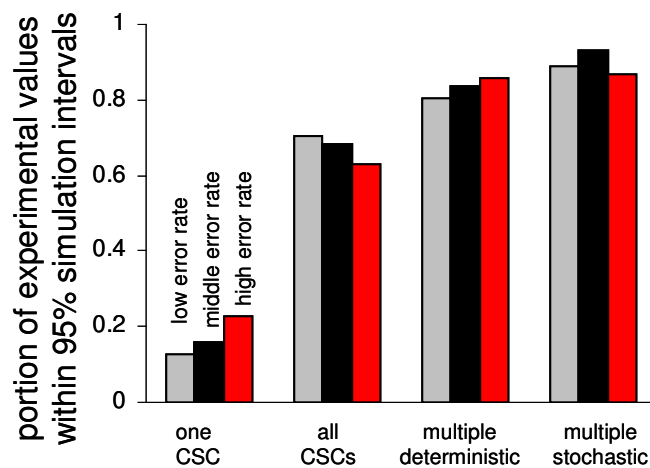

1. Yatabe Y, Tavaré S, Shibata D (2001) Investigating stem cells in human colon by using methylation patterns. Proc Natl Acad Sci USA 98:10839-10844.













0.00  
0.00  
0.00  
0.75  
0.63  
0.00  
0.00  
0.00  
0.13  
0.13  
0.88  
0.75  
0.13  
0.13  
0.00  
0.00  
0.75  
0.63  
0.00  
0.00  
0.00

**average 0.36**

Cancer 7

| BGN           | age        | gland          | gland methylation | unique tags per gland | intradistance | interdistances | side 1      | side 2      | between sides |
|---------------|------------|----------------|-------------------|-----------------------|---------------|----------------|-------------|-------------|---------------|
| side 1        | 43         | CRA-1          | 0.40              | 3.00                  | 0.68          |                | 0.50        | 1.13        | 3.06          |
|               | 43         | CRA-2          | 0.44              | 3.00                  | 0.50          |                | 0.59        | 1.91        | 3.00          |
|               | 43         | CRA-3          | 0.40              | 5.00                  | 1.82          |                | 0.63        | 2.03        | 3.47          |
|               | 43         | CRA-4          | 0.47              | 3.00                  | 0.50          |                | 0.63        | 2.13        | 3.00          |
|               | 43         | CRA-6          | 0.32              | 4.00                  | 1.82          |                | 0.63        | 2.13        | 3.34          |
|               | 43         | CRA-7          | 0.29              | 2.00                  | 0.75          |                | 0.69        | 2.13        | 3.09          |
|               | 43         | CRA-5          | 0.46              | 3.00                  | 0.68          |                | 1.22        | 2.25        | 3.66          |
|               |            |                |                   |                       |               |                | 1.31        | 2.59        | 5.63          |
|               |            |                |                   |                       |               |                | 1.31        | 2.63        | 5.38          |
|               |            |                |                   |                       |               |                | 1.31        | 2.66        | 4.63          |
| side 2        | 43         | CRB-1          | 0.33              | 4.00                  | 0.93          |                | 1.34        | 2.75        | 5.25          |
|               | 43         | CRB-2          | 0.61              | 2.00                  | 0.57          |                | 1.38        | 2.75        | 5.88          |
|               | 43         | CRB-3          | 0.35              | 5.00                  | 1.25          |                | 1.41        | 2.88        | 5.38          |
|               | 43         | CRB-4          | 0.57              | 2.00                  | 0.25          |                | 1.44        | 2.88        | 6.38          |
|               | 43         | CRB-5          | 0.50              | 5.00                  | 1.21          |                | 1.47        | 2.97        | 2.97          |
|               | 43         | CRB-6          | 0.40              | 4.00                  | 1.18          |                | 1.50        | 3.13        | 2.91          |
|               | 43         | CRB-7          | 0.40              | 3.00                  | 0.82          |                | 1.59        | 3.31        | 2.63          |
|               |            |                |                   |                       |               |                | 1.63        | 3.50        | 2.91          |
| <b>Side 1</b> | <b>cra</b> | <b>ave</b>     | <b>0.40</b>       | <b>3.29</b>           | <b>0.96</b>   |                | 1.75        | 3.88        | 3.22          |
| <b>Side 2</b> | <b>crb</b> | <b>ave</b>     | <b>0.45</b>       | <b>3.57</b>           | <b>0.89</b>   |                | 1.78        | 4.25        | 2.84          |
| <b>Both</b>   | <b>cr</b>  | <b>all ave</b> | <b>0.43</b>       | <b>3.43</b>           | <b>0.93</b>   |                | 2.09        | 4.50        | 3.56          |
|               |            |                |                   |                       |               | <b>average</b> | <b>1.25</b> | <b>2.78</b> | 1.50          |
|               |            |                |                   |                       |               | <b>overall</b> | <b>2.01</b> |             | 1.34          |



2.00  
1.13  
1.50  
2.25  
2.50  
3.88  
3.53  
3.69  
3.69  
4.13  
3.91  
4.72  
4.22  
4.16  
3.53  
4.16  
4.47  
3.88  
4.72  
3.75  
3.63  
4.09  
3.59  
4.00  
3.75  
4.50

**average 3.64**

Cancer 8

| BGN           | age       | gland        | gland methylation | unique tags per gland | intradistance | interdistances | side 1      | side 2      | between sides |
|---------------|-----------|--------------|-------------------|-----------------------|---------------|----------------|-------------|-------------|---------------|
| side 1        | 98        | CZA-1        | 0.78              | 3.00                  | 0.79          |                | 0.34        | 0.75        | 1.63          |
|               | 98        | CZA-2        | 0.75              | 3.00                  | 0.50          |                | 0.38        | 1.13        | 1.38          |
|               | 98        | CZA-3        | 0.70              | 2.00                  | 0.75          |                | 0.47        | 1.41        | 1.50          |
|               | 98        | CZA-4        | 0.77              | 2.00                  | 0.25          |                | 0.47        | 1.44        | 1.25          |
|               | 98        | CZA-5        | 0.75              | 5.00                  | 1.43          |                | 0.50        | 1.47        | 1.38          |
|               | 98        | CZA-6        | 0.72              | 2.00                  | 0.50          |                | 0.53        | 1.63        | 1.34          |
|               | 98        | CZA-7        | 0.73              | 4.00                  | 0.75          |                | 0.59        | 1.97        | 1.50          |
|               |           |              |                   |                       |               |                | 0.59        | 2.13        | 5.06          |
|               |           |              |                   |                       |               |                | 0.59        | 2.25        | 4.88          |
| side 2        | 98        | CZB-1        | 0.86              | 2.00                  | 0.25          |                | 0.63        | 2.47        | 4.59          |
|               | 98        | CZB-2        | 0.42              | 3.00                  | 1.68          |                | 0.66        | 2.66        | 4.97          |
|               | 98        | CZB-3        | 0.75              | 3.00                  | 0.50          |                | 0.72        | 2.69        | 4.44          |
|               | 98        | CZB-4        | 0.80              | 3.00                  | 1.04          |                | 0.75        | 2.78        | 4.84          |
|               | 98        | CZB-5        | 0.63              | 3.00                  | 0.86          |                | 0.75        | 2.88        | 5.00          |
|               | 98        | CZB-6        | 0.69              | 5.00                  | 1.71          |                | 0.84        | 3.13        | 0.72          |
|               | 98        | CZB-7        | 0.53              | 6.00                  | 2.14          |                | 0.84        | 3.41        | 0.50          |
|               |           |              |                   |                       |               |                | 0.94        | 3.69        | 0.59          |
|               |           |              |                   |                       |               |                | 0.97        | 3.84        | 0.38          |
| <b>Side 1</b> | <b>98</b> | <b>ave A</b> | <b>0.74</b>       | <b>3.00</b>           | <b>0.71</b>   |                | <b>1.03</b> | <b>3.94</b> | <b>0.91</b>   |

|        |            |      |      |      |                |                |             |
|--------|------------|------|------|------|----------------|----------------|-------------|
| Side 2 | 98 ave B   | 0.67 | 3.57 | 1.17 | 1.06           | 4.03           | 0.50        |
| Both   | 98 ave all | 0.71 | 3.29 | 0.94 | 1.13           | 4.66           | 0.59        |
|        |            |      |      |      | <b>average</b> | <b>0.70</b>    | <b>2.59</b> |
|        |            |      |      |      | <b>overall</b> | <b>1.65</b>    | 1.88        |
|        |            |      |      |      |                |                | 1.53        |
|        |            |      |      |      |                |                | 1.66        |
|        |            |      |      |      |                |                | 1.50        |
|        |            |      |      |      |                |                | 1.59        |
|        |            |      |      |      |                |                | 1.53        |
|        |            |      |      |      |                |                | 1.72        |
|        |            |      |      |      |                |                | 1.75        |
|        |            |      |      |      |                |                | 1.69        |
|        |            |      |      |      |                |                | 1.56        |
|        |            |      |      |      |                |                | 1.63        |
|        |            |      |      |      |                |                | 1.81        |
|        |            |      |      |      |                |                | 1.69        |
|        |            |      |      |      |                |                | 1.63        |
|        |            |      |      |      |                |                | 2.97        |
|        |            |      |      |      |                |                | 2.56        |
|        |            |      |      |      |                |                | 2.63        |
|        |            |      |      |      |                |                | 2.63        |
|        |            |      |      |      |                |                | 2.50        |
|        |            |      |      |      |                |                | 2.56        |
|        |            |      |      |      |                |                | 2.75        |
|        |            |      |      |      |                |                | 2.22        |
|        |            |      |      |      |                |                | 1.84        |
|        |            |      |      |      |                |                | 1.81        |
|        |            |      |      |      |                |                | 1.88        |
|        |            |      |      |      |                |                | 2.19        |
|        |            |      |      |      |                |                | 1.75        |
|        |            |      |      |      |                |                | 2.09        |
|        |            |      |      |      |                | <b>average</b> | <b>2.11</b> |

Cancer 9

| BGN    | age | gland | gland methylation | unique tags per gland | intradistance | interdistances | side 1 | side 2 | between sides |
|--------|-----|-------|-------------------|-----------------------|---------------|----------------|--------|--------|---------------|
| side 1 | 85  | CP1-1 | 0.63              | 5.00                  | 2.07          |                | 1.00   | 1.44   | 2.50          |
|        | 85  | CP1-2 | 0.70              | 6.00                  | 2.04          |                | 1.19   | 1.84   | 2.22          |
|        | 85  | CP1-3 | 0.78              | 4.00                  | 1.07          |                | 1.50   | 1.88   | 1.69          |
|        | 85  | CP1-4 | 0.78              | 6.00                  | 2.36          |                | 1.53   | 1.91   | 2.25          |
|        | 85  | CP1-5 | 0.78              | 5.00                  | 1.86          |                | 1.59   | 1.97   | 1.91          |
|        | 85  | CP1-6 | 0.88              | 2.00                  | 0.50          |                | 1.75   | 2.03   | 1.31          |
|        | 85  | CP1-7 | 0.73              | 7.00                  | 2.96          |                | 2.00   | 2.06   | 2.81          |
|        |     |       |                   |                       |               |                | 2.09   | 2.13   | 3.50          |
|        |     |       |                   |                       |               |                | 2.16   | 2.13   | 2.66          |
| side 2 | 85  | CP2-1 | 0.80              | 5.00                  | 1.96          |                | 2.34   | 2.16   | 2.28          |
|        | 85  | CP2-2 | 0.78              | 7.00                  | 2.86          |                | 2.38   | 2.28   | 2.63          |
|        | 85  | CP2-3 | 0.75              | 7.00                  | 2.29          |                | 2.44   | 2.31   | 2.47          |
|        | 85  | CP2-4 | 0.61              | 4.00                  | 1.32          |                | 2.59   | 2.38   | 2.06          |
|        | 85  | CP2-5 | 0.78              | 4.00                  | 1.71          |                | 2.59   | 2.53   | 2.94          |
|        | 85  | CP2-6 | 0.84              | 3.00                  | 1.86          |                | 2.69   | 2.56   | 2.75          |

|               |                   |             |             |             |                |             |                |             |
|---------------|-------------------|-------------|-------------|-------------|----------------|-------------|----------------|-------------|
|               | 85 CP2-7          | 0.75        | 4.00        | 0.93        |                | 2.72        | 2.59           | 2.53        |
|               |                   |             |             |             |                | 2.75        | 2.72           | 1.81        |
| <b>Side 1</b> | <b>85 CP1-AVE</b> | <b>0.75</b> | <b>5.00</b> | <b>1.84</b> |                | 2.81        | 2.75           | 2.53        |
| <b>Side 2</b> | <b>85 CP2-AVE</b> | <b>0.76</b> | <b>4.86</b> | <b>1.85</b> |                | 2.84        | 2.81           | 2.19        |
| <b>Both</b>   | <b>85 ave all</b> | <b>0.76</b> | <b>4.93</b> | <b>1.84</b> |                | 3.22        | 2.91           | 1.69        |
|               |                   |             |             |             |                | 3.66        | 2.97           | 3.00        |
|               |                   |             |             |             | <b>average</b> | <b>2.28</b> | <b>2.30</b>    | 3.09        |
|               |                   |             |             |             | <b>overall</b> | <b>2.34</b> |                | 2.19        |
|               |                   |             |             |             |                |             |                | 1.72        |
|               |                   |             |             |             |                |             |                | 2.81        |
|               |                   |             |             |             |                |             |                | 2.47        |
|               |                   |             |             |             |                |             |                | 2.28        |
|               |                   |             |             |             |                |             |                | 3.19        |
|               |                   |             |             |             |                |             |                | 2.56        |
|               |                   |             |             |             |                |             |                | 1.81        |
|               |                   |             |             |             |                |             |                | 1.41        |
|               |                   |             |             |             |                |             |                | 2.09        |
|               |                   |             |             |             |                |             |                | 1.66        |
|               |                   |             |             |             |                |             |                | 1.19        |
|               |                   |             |             |             |                |             |                | 2.81        |
|               |                   |             |             |             |                |             |                | 2.75        |
|               |                   |             |             |             |                |             |                | 2.19        |
|               |                   |             |             |             |                |             |                | 2.16        |
|               |                   |             |             |             |                |             |                | 2.22        |
|               |                   |             |             |             |                |             |                | 2.13        |
|               |                   |             |             |             |                |             |                | 1.56        |
|               |                   |             |             |             |                |             |                | 2.78        |
|               |                   |             |             |             |                |             |                | 2.06        |
|               |                   |             |             |             |                |             |                | 1.53        |
|               |                   |             |             |             |                |             |                | 1.53        |
|               |                   |             |             |             |                |             |                | 2.28        |
|               |                   |             |             |             |                |             |                | 1.56        |
|               |                   |             |             |             |                |             |                | 1.25        |
|               |                   |             |             |             |                |             |                | 3.03        |
|               |                   |             |             |             |                |             | <b>average</b> | <b>2.25</b> |

Cancer 10

| BGN | age | gland | gland methylation | unique tags per gland | intradistance | interdistances | side 1 | side 2 | between sides |
|-----|-----|-------|-------------------|-----------------------|---------------|----------------|--------|--------|---------------|
|     |     | HA-1  | 0.61              | 4.00                  | 1.71          |                | 4.50   | 2.41   | 2.13          |
|     |     | HA-2  | 0.51              | 3.00                  | 1.32          |                | 1.88   | 2.47   | 2.38          |
|     |     | HA-3  | 0.72              | 4.00                  | 1.36          |                | 2.47   | 2.75   | 1.88          |
|     |     | HA-4  | 0.53              | 2.00                  | 1.07          |                | 1.50   | 2.41   | 2.13          |
|     |     | HA-5  | 0.53              | 4.00                  | 1.36          |                | 1.06   | 2.88   | 2.00          |
|     |     | HA-6  | 0.57              | 3.00                  | 1.32          |                | 2.34   | 2.19   | 1.75          |
|     |     | HA-7  | 0.65              | 4.00                  | 1.89          |                | 1.63   | 2.00   | 2.25          |
|     |     |       |                   |                       |               |                | 1.22   | 1.88   | 1.69          |
|     |     |       |                   |                       |               |                | 2.31   | 2.38   | 1.91          |
|     |     | HC-1  | 0.53              | 6.00                  | 2.14          |                | 1.09   | 2.38   | 2.03          |
|     |     | HC-2  | 0.44              | 6.00                  | 2.21          |                | 1.63   | 2.25   | 2.16          |

|                |             |             |             |                |                |             |
|----------------|-------------|-------------|-------------|----------------|----------------|-------------|
| HC-3           | 0.67        | 5.00        | 2.36        | 1.28           | 2.50           | 1.63        |
| HC-4           | 0.69        | 4.00        | 2.07        | 2.03           | 2.13           | 1.84        |
| HC-5           | 0.50        | 2.00        | 1.71        | 1.19           | 2.38           | 1.81        |
| HC-6           | 0.58        | 5.00        | 2.21        | 1.28           | 2.13           | 2.59        |
| HC-7           | 0.47        | 3.00        | 1.86        | 1.63           | 2.22           | 3.19        |
|                |             |             |             | 1.91           | 1.88           | 2.13        |
| <b>HA AVE</b>  | <b>0.59</b> | <b>3.43</b> | <b>1.43</b> | 1.84           | 2.63           | 2.06        |
| <b>HC AVE</b>  | <b>0.56</b> | <b>4.43</b> | <b>2.08</b> | 1.78           | 2.72           | 2.63        |
| <b>ave all</b> | <b>0.57</b> | <b>3.93</b> | <b>1.76</b> | 1.88           | 1.63           | 2.13        |
|                |             |             |             | 1.84           | 2.34           | 3.06        |
|                |             |             |             | <b>average</b> | <b>1.82</b>    | <b>2.31</b> |
|                |             |             |             | <b>overall</b> | <b>2.07</b>    | 1.66        |
|                |             |             |             |                |                | 1.78        |
|                |             |             |             |                |                | 1.91        |
|                |             |             |             |                |                | 2.03        |
|                |             |             |             |                |                | 1.50        |
|                |             |             |             |                |                | 1.75        |
|                |             |             |             |                |                | 1.69        |
|                |             |             |             |                |                | 1.78        |
|                |             |             |             |                |                | 1.88        |
|                |             |             |             |                |                | 2.00        |
|                |             |             |             |                |                | 2.03        |
|                |             |             |             |                |                | 1.63        |
|                |             |             |             |                |                | 1.88        |
|                |             |             |             |                |                | 1.84        |
|                |             |             |             |                |                | 1.63        |
|                |             |             |             |                |                | 2.09        |
|                |             |             |             |                |                | 1.97        |
|                |             |             |             |                |                | 1.84        |
|                |             |             |             |                |                | 1.63        |
|                |             |             |             |                |                | 1.84        |
|                |             |             |             |                |                | 1.94        |
|                |             |             |             |                |                | 2.38        |
|                |             |             |             |                |                | 2.66        |
|                |             |             |             |                |                | 1.91        |
|                |             |             |             |                |                | 2.13        |
|                |             |             |             |                |                | 2.25        |
|                |             |             |             |                |                | 1.88        |
|                |             |             |             |                |                | 2.53        |
|                |             |             |             |                | <b>average</b> | <b>2.03</b> |

Cancer 11

| BGN    | age | gland     | gland methylation | unique tags per gland | intradistance | interdistances | side 1 | side 2 | between sides |
|--------|-----|-----------|-------------------|-----------------------|---------------|----------------|--------|--------|---------------|
| side 1 |     | 83 COC1-1 | 0.79              | 7.00                  | 2.11          |                | 1.28   | 1.75   | 2.41          |
|        |     | 83 COC1-2 | 0.75              | 7.00                  | 2.86          |                | 1.94   | 1.75   | 2.75          |
|        |     | 83 COC1-3 | 0.89              | 4.00                  | 1.50          |                | 2.16   | 1.78   | 1.75          |
|        |     | 83 COC1-4 | 0.94              | 3.00                  | 0.79          |                | 2.25   | 2.28   | 1.38          |
|        |     | 83 COC1-5 | 0.65              | 7.00                  | 3.25          |                | 2.38   | 2.31   | 2.84          |
|        |     | 83 COC1-6 | 0.76              | 6.00                  | 2.96          |                | 2.44   | 2.44   | 2.22          |
|        |     | 83 COC1-7 | 0.74              | 4.00                  | 2.18          |                | 2.44   | 2.50   | 2.06          |

|               |                   |             |             |             |                |             |                |             |
|---------------|-------------------|-------------|-------------|-------------|----------------|-------------|----------------|-------------|
|               |                   |             |             |             |                | 2.47        | 2.50           | 2.75        |
|               |                   |             |             |             |                | 2.50        | 2.59           | 3.34        |
| side 2        | 83 COC2-1         | 0.90        | 3.00        | 1.11        |                | 2.56        | 2.69           | 2.53        |
|               | 83 COC2-2         | 0.78        | 6.00        | 2.71        |                | 2.63        | 2.81           | 2.22        |
|               | 83 COC2-3         | 0.69        | 5.00        | 2.14        |                | 2.66        | 2.94           | 3.09        |
|               | 83 COC2-4         | 0.78        | 6.00        | 2.86        |                | 2.66        | 2.94           | 3.03        |
|               | 83 COC2-5         | 0.89        | 5.00        | 1.71        |                | 2.81        | 2.94           | 2.75        |
|               | 83 COC2-6         | 0.68        | 7.00        | 2.68        |                | 2.88        | 3.19           | 2.75        |
|               | 83 COC2-7         | 0.90        | 5.00        | 1.61        |                | 3.06        | 3.22           | 2.59        |
|               |                   |             |             |             |                | 3.06        | 3.44           | 2.53        |
|               |                   |             |             |             |                | 3.41        | 3.50           | 3.03        |
| <b>Side 1</b> | <b>83 ave1</b>    | <b>0.79</b> | <b>5.43</b> | <b>2.23</b> |                | 3.53        | 3.69           | 4.44        |
| <b>Side 2</b> | <b>83 ave2</b>    | <b>0.80</b> | <b>5.29</b> | <b>2.12</b> |                | 3.69        | 4.00           | 3.13        |
| <b>Both</b>   | <b>83 ave all</b> | <b>0.80</b> | <b>5.36</b> | <b>2.18</b> |                | 3.97        | 4.34           | 3.56        |
|               |                   |             |             |             | <b>average</b> | <b>2.70</b> | <b>2.84</b>    | 3.13        |
|               |                   |             |             |             | <b>overall</b> | <b>2.77</b> |                | 3.06        |
|               |                   |             |             |             |                |             |                | 2.44        |
|               |                   |             |             |             |                |             |                | 2.06        |
|               |                   |             |             |             |                |             |                | 3.31        |
|               |                   |             |             |             |                |             |                | 3.06        |
|               |                   |             |             |             |                |             |                | 3.13        |
|               |                   |             |             |             |                |             |                | 2.59        |
|               |                   |             |             |             |                |             |                | 2.97        |
|               |                   |             |             |             |                |             |                | 1.88        |
|               |                   |             |             |             |                |             |                | 1.50        |
|               |                   |             |             |             |                |             |                | 3.69        |
|               |                   |             |             |             |                |             |                | 2.78        |
|               |                   |             |             |             |                |             |                | 3.06        |
|               |                   |             |             |             |                |             |                | 3.28        |
|               |                   |             |             |             |                |             |                | 4.09        |
|               |                   |             |             |             |                |             |                | 3.25        |
|               |                   |             |             |             |                |             |                | 3.28        |
|               |                   |             |             |             |                |             |                | 3.78        |
|               |                   |             |             |             |                |             |                | 3.56        |
|               |                   |             |             |             |                |             |                | 3.16        |
|               |                   |             |             |             |                |             |                | 2.22        |
|               |                   |             |             |             |                |             |                | 2.44        |
|               |                   |             |             |             |                |             |                | 1.53        |
|               |                   |             |             |             |                |             |                | 1.22        |
|               |                   |             |             |             |                |             |                | 3.44        |
|               |                   |             |             |             |                |             |                | 2.56        |
|               |                   |             |             |             |                |             |                | 2.84        |
|               |                   |             |             |             |                |             | <b>average</b> | <b>2.79</b> |

Cancer 12

| BGN    | age | gland | gland methylation | unique tags per gland | intradistance | interdistances | side 1 | side 2 | between sides |
|--------|-----|-------|-------------------|-----------------------|---------------|----------------|--------|--------|---------------|
| side 1 | 44  | CXA1  | 0.39              | 6.00                  | 3.43          |                | 2.44   | 2.44   | 4.34          |
|        | 44  | CXA2  | 0.31              | 7.00                  | 3.36          |                | 2.56   | 2.50   | 4.81          |
|        | 44  | CXA3  | 0.44              | 6.00                  | 2.36          |                | 2.81   | 2.63   | 3.34          |

|        |            |      |      |      |         |         |      |      |
|--------|------------|------|------|------|---------|---------|------|------|
|        | 44 CXA4    | 0.18 | 4.00 | 1.75 |         | 2.91    | 2.66 | 4.97 |
|        | 44 CXA5    | 0.43 | 3.00 | 2.18 |         | 2.97    | 2.66 | 3.94 |
|        | 44 CXA6    | 0.49 | 7.00 | 4.18 |         | 3.06    | 2.78 | 4.19 |
|        | 44 CXA7    | 0.31 | 7.00 | 3.14 |         | 3.09    | 3.00 | 4.97 |
|        |            |      |      |      |         | 3.09    | 3.16 | 4.09 |
|        |            |      |      |      |         | 3.13    | 3.19 | 4.53 |
|        |            |      |      |      |         | 3.16    | 3.19 | 2.75 |
|        |            |      |      |      |         | 3.22    | 3.25 | 4.03 |
| side 2 | 44 CXB1    | 0.67 | 5.00 | 2.64 |         | 3.28    | 3.28 | 3.38 |
|        | 44 CXB2    | 0.58 | 6.00 | 2.57 |         | 3.31    | 3.31 | 4.06 |
|        | 44 CXB3    | 0.47 | 7.00 | 3.79 |         | 3.56    | 3.34 | 4.59 |
|        | 44 CXB4    | 0.53 | 5.00 | 2.64 |         | 3.66    | 3.41 | 4.59 |
|        | 44 CXB5    | 0.58 | 3.00 | 2.64 |         | 3.75    | 3.53 | 4.53 |
|        | 44 CXB6    | 0.67 | 6.00 | 2.86 |         | 3.84    | 3.75 | 4.38 |
|        | 44 CXB7    | 0.50 | 6.00 | 3.50 |         | 3.94    | 3.78 | 4.41 |
|        |            |      |      |      |         | 3.97    | 3.88 | 4.56 |
| Side 1 | 44 AVE A   | 0.36 | 5.71 | 2.91 |         | 4.00    | 3.97 | 4.44 |
| Side 2 | 44 AVE B   | 0.57 | 5.43 | 2.95 |         | 4.03    | 4.00 | 4.56 |
| Both   | 44 AVE ALL | 0.47 | 5.57 | 2.93 | average | 3.32    | 3.22 | 3.66 |
|        |            |      |      |      | overall | 3.27    |      | 3.81 |
|        |            |      |      |      |         |         |      | 3.28 |
|        |            |      |      |      |         |         |      | 4.06 |
|        |            |      |      |      |         |         |      | 3.25 |
|        |            |      |      |      |         |         |      | 4.28 |
|        |            |      |      |      |         |         |      | 3.75 |
|        |            |      |      |      |         |         |      | 3.75 |
|        |            |      |      |      |         |         |      | 4.25 |
|        |            |      |      |      |         |         |      | 2.78 |
|        |            |      |      |      |         |         |      | 4.09 |
|        |            |      |      |      |         |         |      | 3.28 |
|        |            |      |      |      |         |         |      | 4.13 |
|        |            |      |      |      |         |         |      | 4.47 |
|        |            |      |      |      |         |         |      | 4.00 |
|        |            |      |      |      |         |         |      | 4.50 |
|        |            |      |      |      |         |         |      | 3.19 |
|        |            |      |      |      |         |         |      | 4.78 |
|        |            |      |      |      |         |         |      | 3.50 |
|        |            |      |      |      |         |         |      | 4.03 |
|        |            |      |      |      |         |         |      | 4.63 |
|        |            |      |      |      |         |         |      | 3.94 |
|        |            |      |      |      |         |         |      | 4.16 |
|        |            |      |      |      |         |         |      | 3.31 |
|        |            |      |      |      |         |         |      | 4.13 |
|        |            |      |      |      |         |         |      | 3.84 |
|        |            |      |      |      |         |         |      | 4.53 |
|        |            |      |      |      |         |         |      | 4.53 |
|        |            |      |      |      |         | average |      | 4.07 |

## BGN Data: Summary

| Cancer           | Side | side methylation | average methylation | unique tags | average tags | intragland distance | average intragland | distance within side | average side distance | distance between sides |
|------------------|------|------------------|---------------------|-------------|--------------|---------------------|--------------------|----------------------|-----------------------|------------------------|
| 1                | 1    | 0.86             | 0.87                | 5.71        | 5.31         | 1.95                | 1.78               | 1.73                 | 1.89                  | 1.86                   |
| 1                | 2    | 0.88             |                     | 4.83        |              | 1.57                |                    | 2.06                 |                       |                        |
| 2                | 1    | 0.70             | 0.70                | 3.29        | 2.86         | 0.75                | 0.59               | 1.46                 | 1.26                  | 1.23                   |
| 2                | 2    | 0.70             |                     | 2.43        |              | 0.42                |                    | 1.06                 |                       |                        |
| 3                | 1    | 0.48             | 0.50                | 2.43        | 3.21         | 0.60                | 1.15               | 2.43                 | 2.45                  | 2.44                   |
| 3                | 2    | 0.52             |                     | 4.00        |              | 1.70                |                    | 2.47                 |                       |                        |
| 4                | 1    | 0.80             | 0.78                | 3.86        | 3.29         | 1.09                | 0.94               | 2.04                 | 1.65                  | 2.33                   |
| 4                | 2    | 0.75             |                     | 2.71        |              | 0.80                |                    | 1.26                 |                       |                        |
| 5                | 1    | 0.70             | 0.75                | 5.71        | 5.50         | 2.43                | 2.19               | 3.28                 | 2.84                  | 2.93                   |
| 5                | 2    | 0.81             |                     | 5.29        |              | 1.94                |                    | 2.40                 |                       |                        |
| 6                | 1    | 0.02             | 0.02                | 1.57        | 1.71         | 0.22                | 0.24               | 0.39                 | 0.38                  | 0.36                   |
| 6                | 2    | 0.02             |                     | 1.86        |              | 0.27                |                    | 0.36                 |                       |                        |
| 7                | 1    | 0.40             | 0.43                | 3.29        | 3.43         | 0.96                | 0.93               | 1.25                 | 2.01                  | 3.64                   |
| 7                | 2    | 0.45             |                     | 3.57        |              | 0.89                |                    | 2.78                 |                       |                        |
| 8                | 1    | 0.74             | 0.71                | 3.00        | 3.29         | 0.71                | 0.94               | 0.70                 | 1.65                  | 2.11                   |
| 8                | 2    | 0.67             |                     | 3.57        |              | 1.17                |                    | 2.59                 |                       |                        |
| 9                | 1    | 0.75             | 0.76                | 5.00        | 4.93         | 1.84                | 1.84               | 2.28                 | 2.29                  | 2.25                   |
| 9                | 2    | 0.76             |                     | 4.86        |              | 1.85                |                    | 2.30                 |                       |                        |
| 10               | 1    | 0.59             | 0.57                | 3.43        | 3.93         | 1.43                | 1.76               | 1.82                 | 2.07                  | 2.03                   |
| 10               | 2    | 0.56             |                     | 4.43        |              | 2.08                |                    | 2.31                 |                       |                        |
| 11               | 1    | 0.79             | 0.80                | 5.43        | 5.36         | 2.23                | 2.18               | 2.70                 | 2.77                  | 2.79                   |
| 11               | 2    | 0.80             |                     | 5.29        |              | 2.12                |                    | 2.84                 |                       |                        |
| 12               | 1    | 0.36             | 0.47                | 5.71        | 5.57         | 2.91                | 2.93               | 3.32                 | 3.27                  | 4.07                   |
| 12               | 2    | 0.57             |                     | 5.43        |              | 2.95                |                    | 3.22                 |                       |                        |
| overall averages |      |                  | 0.59                |             | 3.92         |                     | 1.43               |                      | 2.06                  | 2.38                   |

## LOC Cancer Gland Data

### Cancer 1

| LOC           | age               | gland       | gland methylation | unique tags per gland | intradistance | interdistances | side 1      | side 2         | between sides |
|---------------|-------------------|-------------|-------------------|-----------------------|---------------|----------------|-------------|----------------|---------------|
| side 1        |                   | 65CWA1      | 0.55              | 8.00                  | 5.93          |                | 5.19        | 5.31           | 5.47          |
|               |                   | 65CWA2      | 0.59              | 8.00                  | 4.00          |                | 5.09        | 7.84           | 5.56          |
|               |                   | 65CWA4      | 0.67              | 8.00                  | 3.39          |                | 5.06        | 4.72           | 5.84          |
|               |                   | 65CWA5      | 0.69              | 8.00                  | 4.04          |                | 5.75        | 5.50           | 5.19          |
|               |                   | 65CWA6      | 0.46              | 8.00                  | 5.75          |                | 3.91        | 5.78           | 5.34          |
|               |                   | 65CWA7      |                   |                       |               |                | 4.16        | 5.06           | 4.88          |
|               |                   | 65CWA8      |                   |                       |               |                | 5.28        | 5.38           | 5.03          |
|               |                   |             |                   |                       |               |                | 3.53        | 5.28           | 5.63          |
|               |                   |             |                   |                       |               | 5.28           | 5.13        | 4.28           |               |
|               |                   |             |                   |                       |               | 5.75           | 4.72        | 4.91           |               |
| side 2        |                   | 65CWB4      | 0.84              | 5.00                  | 1.57          | <b>average</b> | <b>4.90</b> | <b>5.47</b>    | 3.44          |
|               |                   | 65CWB5      | 0.57              | 8.00                  | 6.00          | <b>overall</b> | <b>5.19</b> |                | 4.94          |
|               |                   | 65CWB7      | 0.30              | 8.00                  | 4.07          |                |             |                | 6.19          |
|               |                   | 65CWB8      | 0.58              | 8.00                  | 4.61          |                |             |                | 4.00          |
|               |                   | 65CWB9      | 0.51              | 8.00                  | 5.46          |                |             |                | 4.72          |
|               |                   | 65CWB10     |                   |                       |               |                |             |                | 3.66          |
|               |                   |             |                   |                       |               |                |             | 5.06           |               |
|               |                   |             |                   |                       |               |                |             | 6.44           |               |
| <b>Side 1</b> | <b>65 ave A</b>   | <b>0.59</b> | <b>8.00</b>       | <b>4.62</b>           |               |                |             |                | 4.41          |
| <b>Side 2</b> | <b>65 ave B</b>   | <b>0.56</b> | <b>7.40</b>       | <b>4.34</b>           |               |                |             |                | 5.09          |
| <b>Both</b>   | <b>65 ave all</b> | <b>0.58</b> | <b>7.70</b>       | <b>4.48</b>           |               |                |             |                | 6.50          |
|               |                   |             |                   |                       |               |                |             |                | 5.81          |
|               |                   |             |                   |                       |               |                |             |                | 5.19          |
|               |                   |             |                   |                       |               |                |             |                | 5.25          |
|               |                   |             |                   |                       |               |                |             |                | 5.22          |
|               |                   |             |                   |                       |               |                |             | <b>average</b> | <b>5.12</b>   |

### Cancer 2

| LOC    | age | gland    | gland methylation | unique tags per gland | intradistance | interdistances | side 1 | side 2 | between sides |
|--------|-----|----------|-------------------|-----------------------|---------------|----------------|--------|--------|---------------|
| side 1 |     | 79CNC1-2 | 0.84              | 6.00                  | 2.71          |                | 2.84   | 3.00   | 2.31          |
|        |     | 79CNC1-3 | 0.89              | 6.00                  | 1.71          |                | 2.50   | 2.59   | 3.53          |
|        |     | 79CNC1-4 | 0.81              | 4.00                  | 1.18          |                | 2.81   | 2.31   | 2.88          |
|        |     | 79CNC1-5 | 0.85              | 8.00                  | 2.82          |                | 3.28   | 2.47   | 2.75          |
|        |     | 79CNC1-6 | 0.88              | 8.00                  | 2.96          |                | 2.50   | 2.09   | 2.94          |
|        |     | 79CNC1-7 | 0.97              | 4.00                  | 0.75          |                | 2.75   | 2.28   | 2.28          |
|        |     |          |                   |                       |               |                | 2.53   | 2.28   | 2.41          |
| side 2 |     | 79CNC2-1 | 0.88              | 5.00                  | 2.14          |                | 2.53   | 2.28   | 2.91          |
|        |     | 79CNC2-2 | 0.88              | 4.00                  | 2.43          |                | 1.66   | 2.84   | 2.28          |
|        |     | 79CNC2-3 | 0.92              | 7.00                  | 1.96          |                | 2.25   | 1.63   | 2.00          |
|        |     | 79CNC2-4 | 0.96              | 5.00                  | 1.25          |                | 3.53   | 1.78   | 2.09          |
|        |     | 79CNC2-5 | 0.94              | 5.00                  | 1.75          |                | 2.91   | 2.09   | 2.47          |
|        |     | 79CNC2-7 | 0.90              | 5.00                  | 1.96          |                | 3.09   | 1.44   | 2.66          |
|        |     |          |                   |                       |               |                | 2.38   | 1.84   | 3.81          |
|        |     |          |                   |                       |               | 1.88           | 2.16   | 2.75   |               |







| Cancer 5      |                      |                   |                       |               |                |              |                |               |
|---------------|----------------------|-------------------|-----------------------|---------------|----------------|--------------|----------------|---------------|
| LOC           | age gland            | gland methylation | unique tags per gland | intradistance | interdistances | side 1       | side 2         | between sides |
| side 1        | 53 CTA-1             | 0.47              | 8.00                  | 3.96          |                | 4.19         | 3.63           | 3.88          |
|               | 53 CTA-2             | 0.49              | 8.00                  | 4.82          |                | 4.59         | 4.47           | 4.44          |
|               | 53 CTA-3             | 0.54              | 7.00                  | 4.86          |                | 3.88         | 3.81           | 4.94          |
|               | 53 CTA-4             | 0.49              | 7.00                  | 2.96          |                | 5.03         | 3.94           | 4.16          |
|               | 53 CTA-5             | 0.60              | 3.00                  | 1.82          |                | 4.78         | 3.44           | 4.56          |
|               |                      |                   |                       |               |                | 4.06         | 4.78           | 4.13          |
|               |                      |                   |                       |               |                | 5.09         | 4.19           | 3.97          |
|               |                      |                   |                       |               |                | 3.94         | 4.00           | 4.28          |
| side 2        | 53 CTB-1             | 0.55              | 7.00                  | 3.64          |                | 5.06         | 3.59           | 4.94          |
|               | 53 CTB-2             | 0.65              | 8.00                  | 3.54          |                | 3.28         | 4.69           | 4.38          |
|               | 53 CTB-3             | 0.47              | 8.00                  | 5.32          | <b>average</b> | <b>4.39</b>  | 5.06           | 4.50          |
|               | 53 CTB-4             | 0.51              | 8.00                  | 3.54          |                |              | 4.41           | 4.22          |
|               | 53 CTB-5             | 0.57              | 8.00                  | 4.50          |                |              | 4.75           | 4.31          |
|               | 53 CTB-6             | 0.54              | 7.00                  | 3.36          |                |              | 3.75           | 4.63          |
|               |                      |                   |                       |               |                | 4.22         |                | 5.34          |
| <b>Side 1</b> | <b>53 ave CTA</b>    | <b>0.52</b>       | <b>6.60</b>           | <b>3.69</b>   | <b>average</b> |              | <b>4.18</b>    | 4.38          |
| <b>Side 2</b> | <b>53 ave CTB</b>    | <b>0.55</b>       | <b>7.67</b>           | <b>3.98</b>   | <b>overall</b> | <b>#REF!</b> |                | 4.88          |
| <b>Both</b>   | <b>53 ave all CT</b> | <b>0.54</b>       | <b>7.18</b>           | <b>3.85</b>   |                |              |                | 4.53          |
|               |                      |                   |                       |               |                |              |                | 3.63          |
|               |                      |                   |                       |               |                |              |                | 4.03          |
|               |                      |                   |                       |               |                |              |                | 4.38          |
|               |                      |                   |                       |               |                |              |                | 3.13          |
|               |                      |                   |                       |               |                |              |                | 4.38          |
|               |                      |                   |                       |               |                |              |                | 3.69          |
|               |                      |                   |                       |               |                |              |                | 4.31          |
|               |                      |                   |                       |               |                |              |                | 4.59          |
|               |                      |                   |                       |               |                |              |                | 4.81          |
|               |                      |                   |                       |               |                |              |                | 3.25          |
|               |                      |                   |                       |               |                |              |                | 5.03          |
|               |                      |                   |                       |               |                |              |                | 4.16          |
|               |                      |                   |                       |               |                |              | <b>average</b> | <b>4.33</b>   |
| Cancer 6      |                      |                   |                       |               |                |              |                |               |
| LOC           | age gland            | gland methylation | unique tags per gland | intradistance | interdistances | side 1       | side 2         | between sides |
| side 1        | 51 CSA-1             | 0.75              | 8.00                  | 3.71          |                | 4.00         | 4.03           | 3.72          |
|               | 51 CSA-2             | 0.74              | 8.00                  | 3.89          |                | 3.88         | 3.84           | 3.72          |
|               | 51 CSA-4             | 0.67              | 6.00                  | 3.25          |                | 5.44         | 3.78           | 3.78          |
|               | 51 CSA-6             | 0.70              | 7.00                  | 2.36          |                | 4.16         | 4.22           | 3.91          |
|               | 51 CSA-3             | 0.92              | 6.00                  | 1.96          |                | 3.88         | 3.94           | 3.72          |
|               |                      |                   |                       |               |                | 4.47         | 4.06           | 3.50          |
| side 2        | 51 CSC-1             |                   |                       |               |                | 4.06         | 2.88           | 3.47          |
|               | 51 CSC-2             | 0.73              | 6.00                  | 2.43          |                | 4.47         | 4.78           | 4.13          |
|               | 51 CSC-3             | 0.74              | 7.00                  | 2.61          |                | 4.03         | 4.00           | 3.78          |



| Cancer 8      |                   |                   |                       |               |                |             |                |               |
|---------------|-------------------|-------------------|-----------------------|---------------|----------------|-------------|----------------|---------------|
| LOC           | age gland         | gland methylation | unique tags per gland | intradistance | interdistances | side 1      | side 2         | between sides |
| side 1        | 98 CZA-1          | 0.88              | 7.00                  | 2.04          |                | 1.75        | 3.78           | 4.00          |
|               | 98 CZA-2          | 0.87              | 5.00                  | 1.32          |                | 1.97        | 3.69           | 2.97          |
|               | 98 CZA-3          | 0.90              | 8.00                  | 1.96          |                | 2.09        | 3.75           | 2.25          |
|               | 98 CZA-4          | 0.86              | 5.00                  | 1.93          |                | 2.75        | 3.91           | 2.13          |
|               | 98 CZA-5          | 0.81              | 8.00                  | 3.75          |                | 2.16        | 4.16           | 2.56          |
|               | 98 CZA-6          | 0.95              | 5.00                  | 1.43          |                | 1.72        | 2.25           | 3.41          |
|               |                   |                   |                       |               |                | 1.72        | 2.06           | 4.03          |
|               |                   |                   |                       |               |                | 2.63        | 2.34           | 2.69          |
| side 2        | 98 CZB-1          | 0.76              | 8.00                  | 5.32          |                | 2.34        | 2.47           | 2.53          |
|               | 98 CZB-2          | 0.88              | 6.00                  | 2.11          |                | 1.97        | 1.38           | 2.38          |
|               | 98 CZB-3          | 0.94              | 5.00                  | 1.61          |                | 2.84        | 1.94           | 2.78          |
|               | 98 CZB-4          | 0.96              | 4.00                  | 0.93          |                | 1.91        | 2.84           | 3.22          |
|               | 98 CZB-5          | 0.92              | 3.00                  | 2.11          |                | 2.91        | 1.59           | 4.03          |
|               | 98 CZB-7          | 0.84              | 5.00                  | 3.00          |                | 2.38        | 2.63           | 2.59          |
|               |                   |                   |                       |               |                | 2.97        | 2.81           | 2.09          |
| <b>Side 1</b> | <b>98 AVE CZA</b> | <b>0.88</b>       | <b>6.33</b>           | <b>2.07</b>   | <b>average</b> | <b>2.27</b> | <b>2.77</b>    | 1.84          |
| <b>Side 2</b> | <b>98 AVE CZB</b> | <b>0.88</b>       | <b>5.17</b>           | <b>2.51</b>   | <b>overall</b> | <b>2.52</b> |                | 2.38          |
| <b>Both</b>   | <b>98 AVE ALL</b> | <b>0.88</b>       | <b>5.75</b>           | <b>2.29</b>   |                |             |                | 3.13          |
|               |                   |                   |                       |               |                |             |                | 4.25          |
|               |                   |                   |                       |               |                |             |                | 3.16          |
|               |                   |                   |                       |               |                |             |                | 2.47          |
|               |                   |                   |                       |               |                |             |                | 2.50          |
|               |                   |                   |                       |               |                |             |                | 3.03          |
|               |                   |                   |                       |               |                |             |                | 3.69          |
|               |                   |                   |                       |               |                |             |                | 4.56          |
|               |                   |                   |                       |               |                |             |                | 3.63          |
|               |                   |                   |                       |               |                |             |                | 3.16          |
|               |                   |                   |                       |               |                |             |                | 3.00          |
|               |                   |                   |                       |               |                |             |                | 3.53          |
|               |                   |                   |                       |               |                |             |                | 4.00          |
|               |                   |                   |                       |               |                |             |                | 3.81          |
|               |                   |                   |                       |               |                |             |                | 2.28          |
|               |                   |                   |                       |               |                |             |                | 1.53          |
|               |                   |                   |                       |               |                |             |                | 1.22          |
|               |                   |                   |                       |               |                |             |                | 1.81          |
|               |                   |                   |                       |               |                |             |                | 2.91          |
|               |                   |                   |                       |               |                |             | <b>average</b> | <b>2.93</b>   |

Cancer 9

| LOC           | age gland            | gland methylation | unique tags per gland | intradistance | interdistances | side 1      | side 2         | between sides |
|---------------|----------------------|-------------------|-----------------------|---------------|----------------|-------------|----------------|---------------|
| side 1        | 85 CP1-2             | 0.70              | 7.00                  | 2.57          |                | 4.53        | 4.41           | 6.31          |
|               | 85 CP1-3             | 0.40              | 8.00                  | 3.39          |                | 4.41        | 4.66           | 5.75          |
|               | 85 CP1-4             | 0.63              | 7.00                  | 4.21          |                | 4.16        | 5.94           | 5.13          |
|               | 85 CP1-5             | 0.64              | 6.00                  | 2.86          |                | 5.22        | 4.25           | 6.25          |
|               | 85 CP1-6             | 0.63              | 8.00                  | 5.57          |                | 5.09        | 4.91           | 5.44          |
|               | 85 CPA1-1            | 0.57              | 8.00                  | 4.21          |                | 4.25        | 6.91           | 4.53          |
|               |                      |                   |                       |               |                | 3.91        | 5.75           | 6.69          |
| side 2        | 85 CP2-1             | 0.65              | 8.00                  | 4.61          |                | 4.88        | 6.66           | 4.84          |
|               | 85 CP2-2             | 0.41              | 7.00                  | 2.64          |                | 4.47        | 4.69           | 4.31          |
|               | 85 CP2-3             | 0.78              | 7.00                  | 3.25          |                | 4.69        | 5.25           | 6.19          |
|               | 85 CP2-4             | 0.60              | 7.00                  | 3.25          |                | 5.31        | 4.09           | 3.75          |
|               | 85 CP2-5             | 0.61              | 8.00                  | 4.93          |                | 3.69        | 4.38           | 6.22          |
|               | 85 CP2-6             | 0.70              | 4.00                  | 2.64          |                | 4.72        | 4.16           | 4.53          |
|               |                      |                   |                       |               |                | 4.50        | 5.41           | 7.19          |
| <b>Side 1</b> | <b>85 AVE1</b>       | <b>0.59</b>       | <b>7.33</b>           | <b>3.80</b>   | <b>average</b> | <b>4.56</b> | <b>5.10</b>    | 6.06          |
| <b>Side 2</b> | <b>85 AVE2</b>       | <b>0.62</b>       | <b>6.83</b>           | <b>3.55</b>   | <b>overall</b> | <b>4.83</b> |                | 7.38          |
| <b>Both</b>   | <b>85 ave CP all</b> | <b>0.61</b>       | <b>7.08</b>           | <b>3.68</b>   |                |             |                | 6.19          |
|               |                      |                   |                       |               |                |             |                | 4.78          |
|               |                      |                   |                       |               |                |             |                | 5.06          |
|               |                      |                   |                       |               |                |             |                | 4.75          |
|               |                      |                   |                       |               |                |             |                | 4.84          |
|               |                      |                   |                       |               |                |             |                | 5.88          |
|               |                      |                   |                       |               |                |             |                | 4.34          |
|               |                      |                   |                       |               |                |             |                | 4.03          |
|               |                      |                   |                       |               |                |             |                | 4.66          |
|               |                      |                   |                       |               |                |             |                | 4.31          |
|               |                      |                   |                       |               |                |             |                | 3.97          |
|               |                      |                   |                       |               |                |             |                | 5.50          |
|               |                      |                   |                       |               |                |             |                | 3.66          |
|               |                      |                   |                       |               |                |             |                | 5.47          |
|               |                      |                   |                       |               |                |             |                | 5.84          |
|               |                      |                   |                       |               |                |             |                | 5.22          |
|               |                      |                   |                       |               |                |             |                | 5.50          |
|               |                      |                   |                       |               |                |             |                | 6.34          |
|               |                      |                   |                       |               |                |             |                | 5.34          |
|               |                      |                   |                       |               |                |             | <b>average</b> | <b>5.10</b>   |

Cancer 10

| LOC    | age gland | gland methylation | unique tags per gland | intradistance | interdistances | side 1 | side 2 | between sides |
|--------|-----------|-------------------|-----------------------|---------------|----------------|--------|--------|---------------|
| side 1 | 61 HA-1   | 0.79              | 6.00                  | 2.57          |                | 2.78   | 2.03   | 2.84          |
|        | 61 HA-4   | 0.82              | 5.00                  | 1.50          |                | 3.53   | 2.66   | 3.31          |
|        | 61 HA-5   | 0.69              | 7.00                  | 2.32          |                | 2.19   | 3.31   | 3.75          |
|        | 61 HA-6   | 0.84              | 3.00                  | 1.64          |                | 3.03   | 1.41   | 3.06          |
|        | 61 HA-7   | 0.73              | 6.00                  | 2.36          |                | 2.13   | 2.66   | 3.75          |
|        | 61 HA-8   | 0.74              | 7.00                  | 2.39          |                | 3.56   | 3.16   | 4.31          |
|        |           |                   |                       |               |                | 2.50   | 2.50   | 1.25          |
| side 2 | 61 HC-1   | 0.82              | 3.00                  | 0.93          |                | 2.78   | 3.16   | 2.25          |
|        | 61 HC-2   | 0.72              | 6.00                  | 2.54          |                | 3.38   | 3.66   | 2.53          |



| Cancer 12     |                      |                   |                       |               |                |             |                |               |
|---------------|----------------------|-------------------|-----------------------|---------------|----------------|-------------|----------------|---------------|
| LOC           | age gland            | gland methylation | unique tags per gland | intradistance | interdistances | side 1      | side 2         | between sides |
| side 1        | 44 CXA-1             | 0.66              | 8.00                  | 4.93          |                | 5.44        | 3.78           | 4.34          |
|               | 44 CXA-2             | 0.61              | 8.00                  | 5.71          |                | 5.56        | 5.41           | 5.06          |
|               | 44 CXA-3             | 0.47              | 8.00                  | 4.89          |                | 4.78        | 3.41           | 6.09          |
|               | 44 CXA-5             | 0.54              | 8.00                  | 4.75          |                | 5.16        | 3.13           | 4.31          |
|               | 44 CXA-6             | 0.67              | 8.00                  | 5.32          |                | 4.56        | 4.06           | 4.72          |
|               | 44 CXA-7             | 0.56              | 7.00                  | 3.46          |                | 5.72        | 5.72           | 5.31          |
|               |                      |                   |                       |               |                | 5.31        | 3.84           | 5.13          |
|               |                      |                   |                       |               |                | 5.66        | 3.66           | 6.13          |
| side 2        | 44 CXB-1             | 0.60              | 7.00                  | 3.46          |                | 4.72        | 4.06           | 6.22          |
|               | 44 CXB-2             | 0.59              | 6.00                  | 3.79          |                | 4.94        | 5.47           | 5.41          |
|               | 44 CXB-3             | 0.45              | 7.00                  | 5.50          |                | 5.63        | 5.13           | 5.13          |
|               | 44 CXB-4             | 0.66              | 8.00                  | 3.64          |                | 4.75        | 5.00           | 5.81          |
|               | 44 CXB-5             | 0.63              | 6.00                  | 2.93          |                | 5.59        | 3.38           | 4.44          |
|               | 44 CXB-7             | 0.49              | 7.00                  | 3.18          |                | 4.66        | 4.19           | 5.19          |
|               |                      |                   |                       |               |                | 4.97        | 3.78           | 5.53          |
| <b>Side 1</b> | <b>44 ave cxa</b>    | <b>0.59</b>       | <b>7.83</b>           | <b>4.85</b>   | <b>average</b> | <b>5.16</b> | <b>4.27</b>    | 4.94          |
| <b>Side 2</b> | <b>44 ave cxb</b>    | <b>0.57</b>       | <b>6.83</b>           | <b>3.75</b>   | <b>overall</b> | <b>4.71</b> |                | 4.38          |
| <b>Both</b>   | <b>44 ave all cx</b> | <b>0.58</b>       | <b>7.33</b>           | <b>4.30</b>   |                |             |                | 5.31          |
|               |                      |                   |                       |               |                |             |                | 4.09          |
|               |                      |                   |                       |               |                |             |                | 4.69          |
|               |                      |                   |                       |               |                |             |                | 5.44          |
|               |                      |                   |                       |               |                |             |                | 4.34          |
|               |                      |                   |                       |               |                |             |                | 4.28          |
|               |                      |                   |                       |               |                |             |                | 4.31          |
|               |                      |                   |                       |               |                |             |                | 4.66          |
|               |                      |                   |                       |               |                |             |                | 5.34          |
|               |                      |                   |                       |               |                |             |                | 6.44          |
|               |                      |                   |                       |               |                |             |                | 4.66          |
|               |                      |                   |                       |               |                |             |                | 4.81          |
|               |                      |                   |                       |               |                |             |                | 6.38          |
|               |                      |                   |                       |               |                |             |                | 3.94          |
|               |                      |                   |                       |               |                |             |                | 5.47          |
|               |                      |                   |                       |               |                |             |                | 5.66          |
|               |                      |                   |                       |               |                |             |                | 4.56          |
|               |                      |                   |                       |               |                |             |                | 4.28          |
|               |                      |                   |                       |               |                |             |                | 5.25          |
|               |                      |                   |                       |               |                |             | <b>average</b> | <b>5.06</b>   |



## LOC Data: Summary

| Cancer           | Side | side methylation | average methylation | unique tags | average tags | intragland distance | average intragland | distance within side | average side distance | distance between sides |
|------------------|------|------------------|---------------------|-------------|--------------|---------------------|--------------------|----------------------|-----------------------|------------------------|
| 1                | 1    | 0.59             | 0.58                | 8.00        | 7.70         | 4.62                | 4.48               | 4.90                 | 5.19                  | 5.12                   |
| 1                | 2    | 0.56             |                     | 7.40        |              | 4.34                |                    | 5.47                 |                       |                        |
| 2                | 1    | 0.88             | 0.89                | 6.00        | 5.58         | 2.02                | 1.97               | 2.63                 | 2.42                  | 2.48                   |
| 2                | 2    | 0.91             |                     | 5.17        |              | 1.92                |                    | 2.21                 |                       |                        |
| 3                | 1    | 0.79             | 0.75                | 2.67        | 3.25         | 1.05                | 1.26               | 3.75                 | 3.67                  | 4.41                   |
| 3                | 2    | 0.72             |                     | 3.83        |              | 1.46                |                    | 3.60                 |                       |                        |
| 4                | 1    | 0.71             | 0.63                | 5.83        | 5.83         | 2.27                | 2.10               | 3.47                 | 3.66                  | 4.92                   |
| 4                | 2    | 0.56             |                     | 5.83        |              | 1.93                |                    | 3.85                 |                       |                        |
| 5                | 1    | 0.52             | 0.54                | 6.60        | 7.18         | 3.69                | 3.85               | 4.39                 | 4.29                  | 4.33                   |
| 5                | 2    | 0.55             |                     | 7.67        |              | 3.98                |                    | 4.18                 |                       |                        |
| 6                | 1    | 0.76             | 0.76                | 7.00        | 6.80         | 3.04                | 2.83               | 4.40                 | 4.20                  | 3.95                   |
| 6                | 2    | 0.76             |                     | 6.60        |              | 2.62                |                    | 4.01                 |                       |                        |
| 7                | 1    | 0.93             | 0.90                | 4.67        | 4.50         | 1.42                | 1.34               | 1.75                 | 1.71                  | 2.18                   |
| 7                | 2    | 0.87             |                     | 4.33        |              | 1.26                |                    | 1.66                 |                       |                        |
| 8                | 1    | 0.88             | 0.88                | 6.33        | 5.75         | 2.07                | 2.29               | 2.27                 | 2.52                  | 2.93                   |
| 8                | 2    | 0.88             |                     | 5.17        |              | 2.51                |                    | 2.77                 |                       |                        |
| 9                | 1    | 0.59             | 0.61                | 7.33        | 7.08         | 3.80                | 3.68               | 4.54                 | 4.86                  | 5.31                   |
| 9                | 2    | 0.62             |                     | 6.83        |              | 3.55                |                    | 5.17                 |                       |                        |
| 10               | 1    | 0.77             | 0.75                | 5.67        | 4.83         | 2.13                | 1.96               | 2.81                 | 2.87                  | 2.92                   |
| 10               | 2    | 0.74             |                     | 4.00        |              | 1.78                |                    | 2.92                 |                       |                        |
| 11               | 1    | 0.59             | 0.58                | 7.80        | 7.80         | 4.51                | 4.69               | 5.11                 | 5.37                  | 5.31                   |
| 11               | 2    | 0.57             |                     | 7.80        |              | 4.88                |                    | 5.63                 |                       |                        |
| 12               | 1    | 0.59             | 0.58                | 7.83        | 7.33         | 4.85                | 4.30               | 5.16                 | 4.71                  | 5.06                   |
| 12               | 2    | 0.57             |                     | 6.83        |              | 3.75                |                    | 4.27                 |                       |                        |
| overall averages |      |                  | 0.70                |             | 6.14         |                     | 2.89               |                      | 3.79                  | 4.08                   |
